# Supplementary material for: Nonthermal Plasma Synthesis of Metallic Ti Nanocrystals
Source: MDPI journal article supplement (doi:10.3390/nano14030264), 2024-01-26
Supplement: s1 [file s1]

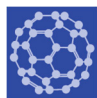

Article

# Supplementary Information

Qiaomiao Tu <sup>1</sup>, David L. Poerschke <sup>1,\*</sup> and Uwe R. Kortshagen <sup>2,\*</sup>

<sup>1</sup> Department of Chemical Engineering and Materials Science, University of Minnesota, Minneapolis, MN 55455, USA; tu000007@umn.edu

<sup>2</sup> Department of Mechanical Engineering, University of Minnesota, Minneapolis, MN 55455, USA

\* Correspondence: dpoersch@umn.edu (D.L.P.); korts001@umn.edu (U.R.K.)

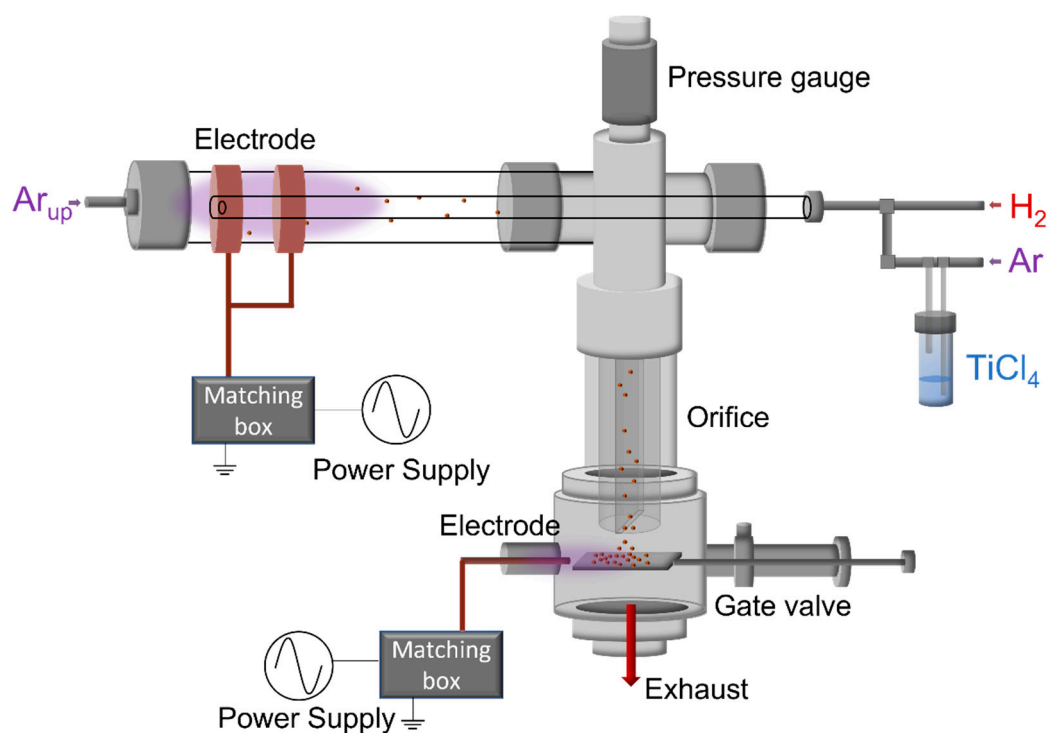

**Figure S1.** Schematic of the nonthermal plasma reactor for Ti nanoparticle production

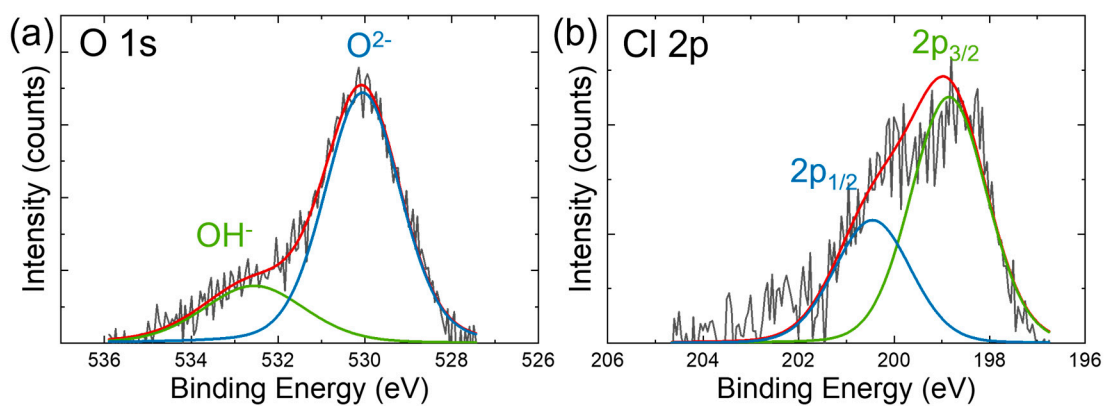

**Figure S2.** XPS high-resolution spectra of (a) O 2p and (b) Cl 2p of as-synthesized nanoparticles as seen in Figure 1

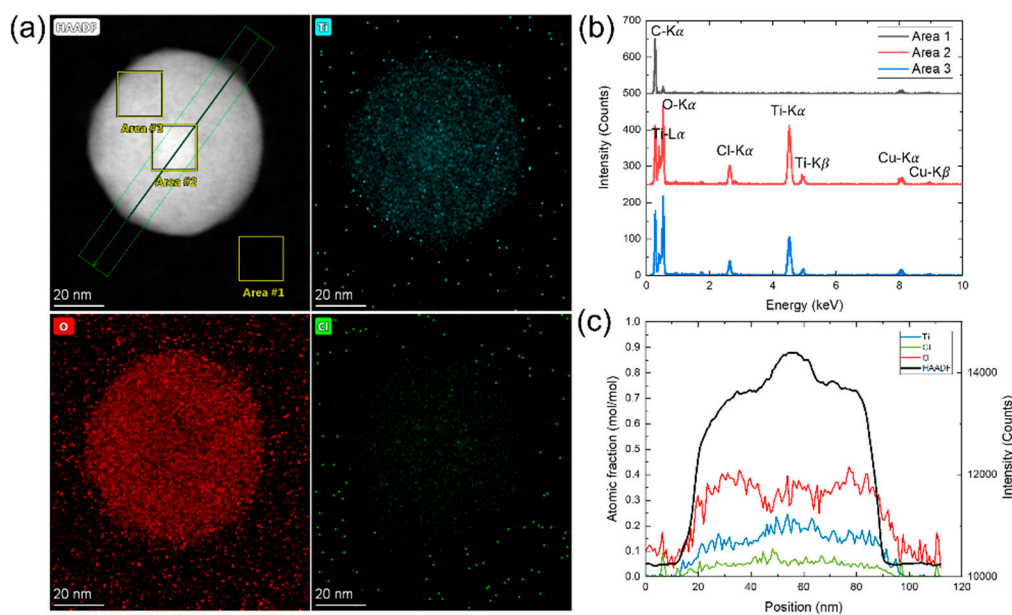

**Figure S3.** HAADF-STEM-EDS mapping images of as-synthesized nanoparticles as seen in Figure 1. (a) HAADF and EDS mapping images (b) EDS of three selected areas from (a) (c) line scanning profile across the particle as indicated in (a).

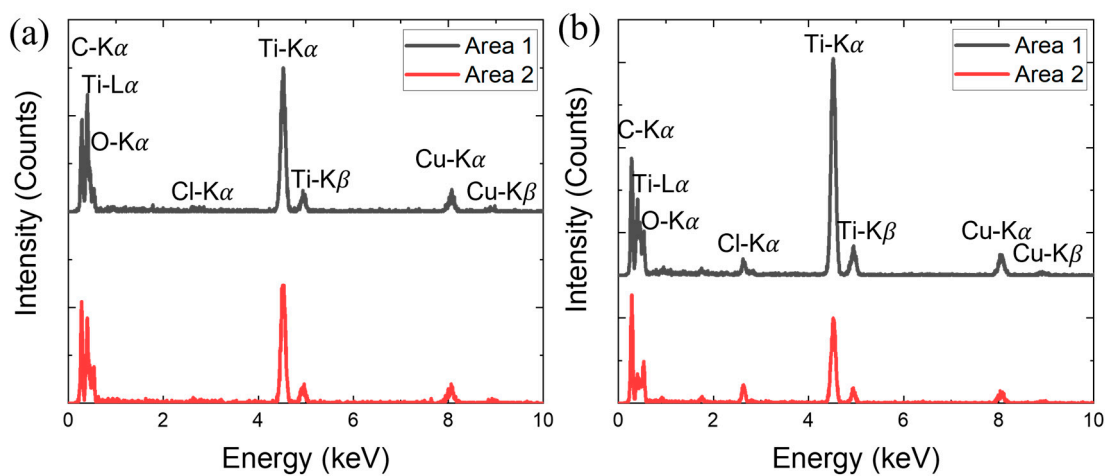

**Figure S4.** EDS of the (a) cubic nanoparticle and (b) hexagonal nanoparticle selected from two areas, area 1 at the particle center, area 2 at the periphery indicated in Figure 3 (a) and Figure 4 (a).

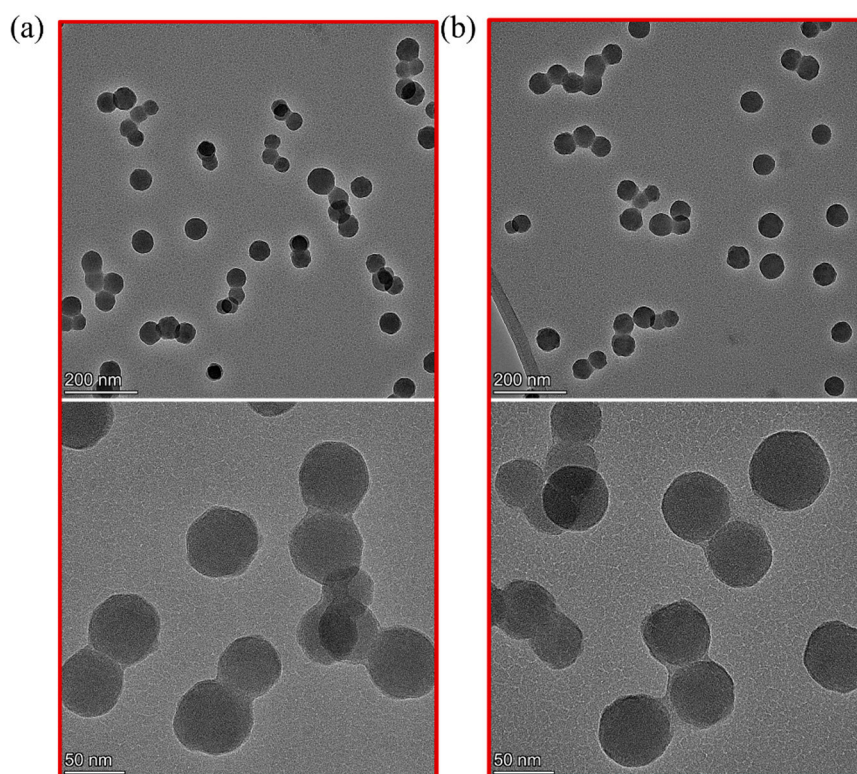

**Figure S5.** (a) CTEM images of oxidized Ti nanoparticles after exposure to the air (b) CTEM images of Ti nanoparticle treated with the secondary H<sub>2</sub> plasma after exposure to the air.

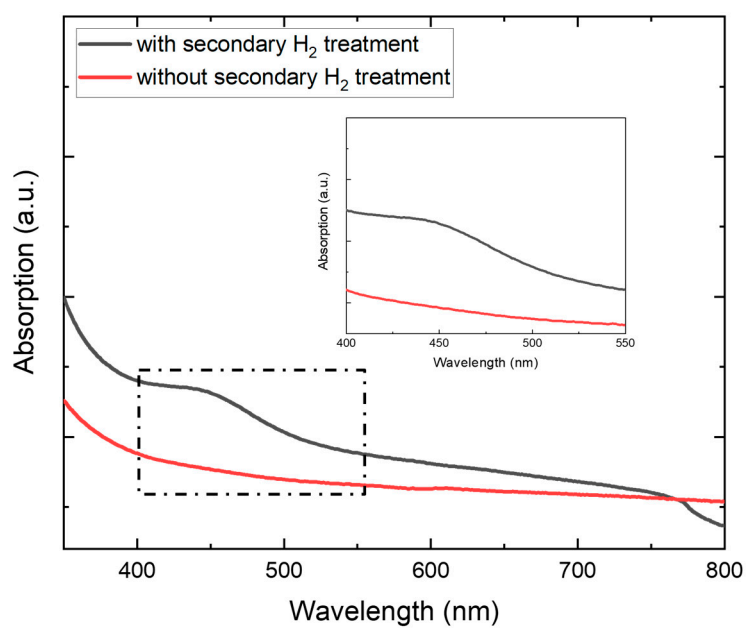

**Figure S6.** UV-Vis absorbance spectra of Ti nanoparticles with and without secondary H<sub>2</sub> plasma treatment, inset shows the zoomed in view of 400–550 nm range of the spectra.

**Table S1.** Plasma synthesis conditions.

| Conditions                            | Values     |
|---------------------------------------|------------|
| Electrode                             | CCP        |
| Power                                 | 50 - 150 W |
| Ar <sub>up</sub> flow rate            | 25 sccm    |
| H <sub>2</sub> flow rate              | 180 sccm   |
| Ar(TiCl <sub>4</sub> ) flow rate      | 15 sccm    |
| TiCl <sub>4</sub> bubbler temperature | 0 °C       |
| TiCl <sub>4</sub> bubbler pressure    | 236 Torr   |
| Chamber pressure                      | 2.5 Torr   |

**Table S2.** Predicted parameters from the optimized line profile fitting.

| Fitted element | Hexagonal shaped particle |               | Cubic shaped particle |               |
|----------------|---------------------------|---------------|-----------------------|---------------|
|                | Parameter                 | Fitted values | Parameter             | Fitted values |
| O              | $R_c$                     | 34 nm         | $R_c$                 | 27 nm         |
|                | $R_s$                     | 46 nm         | $R_s$                 | 37 nm         |
|                | $a$                       | 0.31          | $a$                   | 0.40          |
| Cl             | $R_c$                     | 29 nm         | $R_c$                 | 31 nm         |
|                | $R_s$                     | 46 nm         | $R_s$                 | 37 nm         |
|                | $b$                       | 0.13          | $b$                   | 0.08          |

### Line profile mode

A cubic core-shell structure was used to model the cubic nanoparticles and a spherical core-shell structure was used to approximate the hexagonal nanoparticle. 2D projections of the 3D models are shown in Figure 3 (b) and 4 (b), respectively. The core radius is denoted as  $R_c$  and the particle radius is denoted as  $R_s$ . At a certain beam path distance  $p$  from the center of the particle, the 1D EDS intensity counts along the beam axis are assumed to be proportional to two section of the beam path through the particle, the section in the core region with length  $L_c$  and the two sections in the shell region with combined length  $L_s$ .

For the cubic model, the lengths are calculated as

$$L_c = \begin{cases} 2 \times R_c & (0 \leq p \leq R_c) \\ 0 & (R_c < p \leq R_s) \end{cases}$$

$$L_s = \begin{cases} 2 \times (R_s - R_c) & (0 \leq p \leq R_c) \\ 2 \times R_s & (R_c < p \leq R_s) \end{cases}$$

Likewise, for the spherical model, the lengths are calculated as

$$L_c = \begin{cases} 2 \times \sqrt{R_c^2 - p^2} & (0 \leq p \leq R_c) \\ 0 & (R_c < p \leq R_s) \end{cases}$$

$$L_s = \begin{cases} 2 \times (\sqrt{R_s^2 - p^2} - \sqrt{R_c^2 - p^2}) & (0 \leq p \leq R_c) \\ 2 \times \sqrt{R_s^2 - p^2} & (R_c < p \leq R_s) \end{cases}$$

By assuming a core of pure metallic Ti and a shell of Ti<sub>1-a-b</sub>O<sub>a</sub>Cl<sub>b</sub>, the intensity counts of Ti, O, and Cl are expressed as

$$I_{Ti} = L_c + L_s \times (1 - a - b)$$

$$I_O = L_s \times a$$

$$I_{Cl} = L_s \times b$$

We specify the normalized root mean square error (NRMSE)

$$NRMSE = \frac{\sqrt{\sum (x - \hat{x})^2}}{\sqrt{\sum (x - \bar{x})^2}}$$

as the cost function and then calculate the goodness of fit. Here,  $x$  represents the experimental data,  $\hat{x}$  the predicated values, and  $\bar{x}$  the mean of the experimental data.
